# Supplementary material for: Proteome-scale identification of outer membrane proteins in Mycobacterium avium subspecies paratuberculosis using a structure based combined hierarchical approach
Source: Royal Society of Chemistry journal article supplement (doi:10.1039/c4mb00234b), 2014-06-13
Supplement: c4mb00234b1.pdf [file c4mb00234b1.pdf]

## **SUPPORTING INFORMATION**

### **Supplementary Figure Legends:**

**Figure S1: Signal Peptide scores of reference OMPs.** Reference Outer Membrane Proteins with SP-Score as predicted using TargetP 1.1 program. Catecholate siderophore receptor FliC of *Escherichia coli* (K12) scored the lowest value of SP score as 0.532.

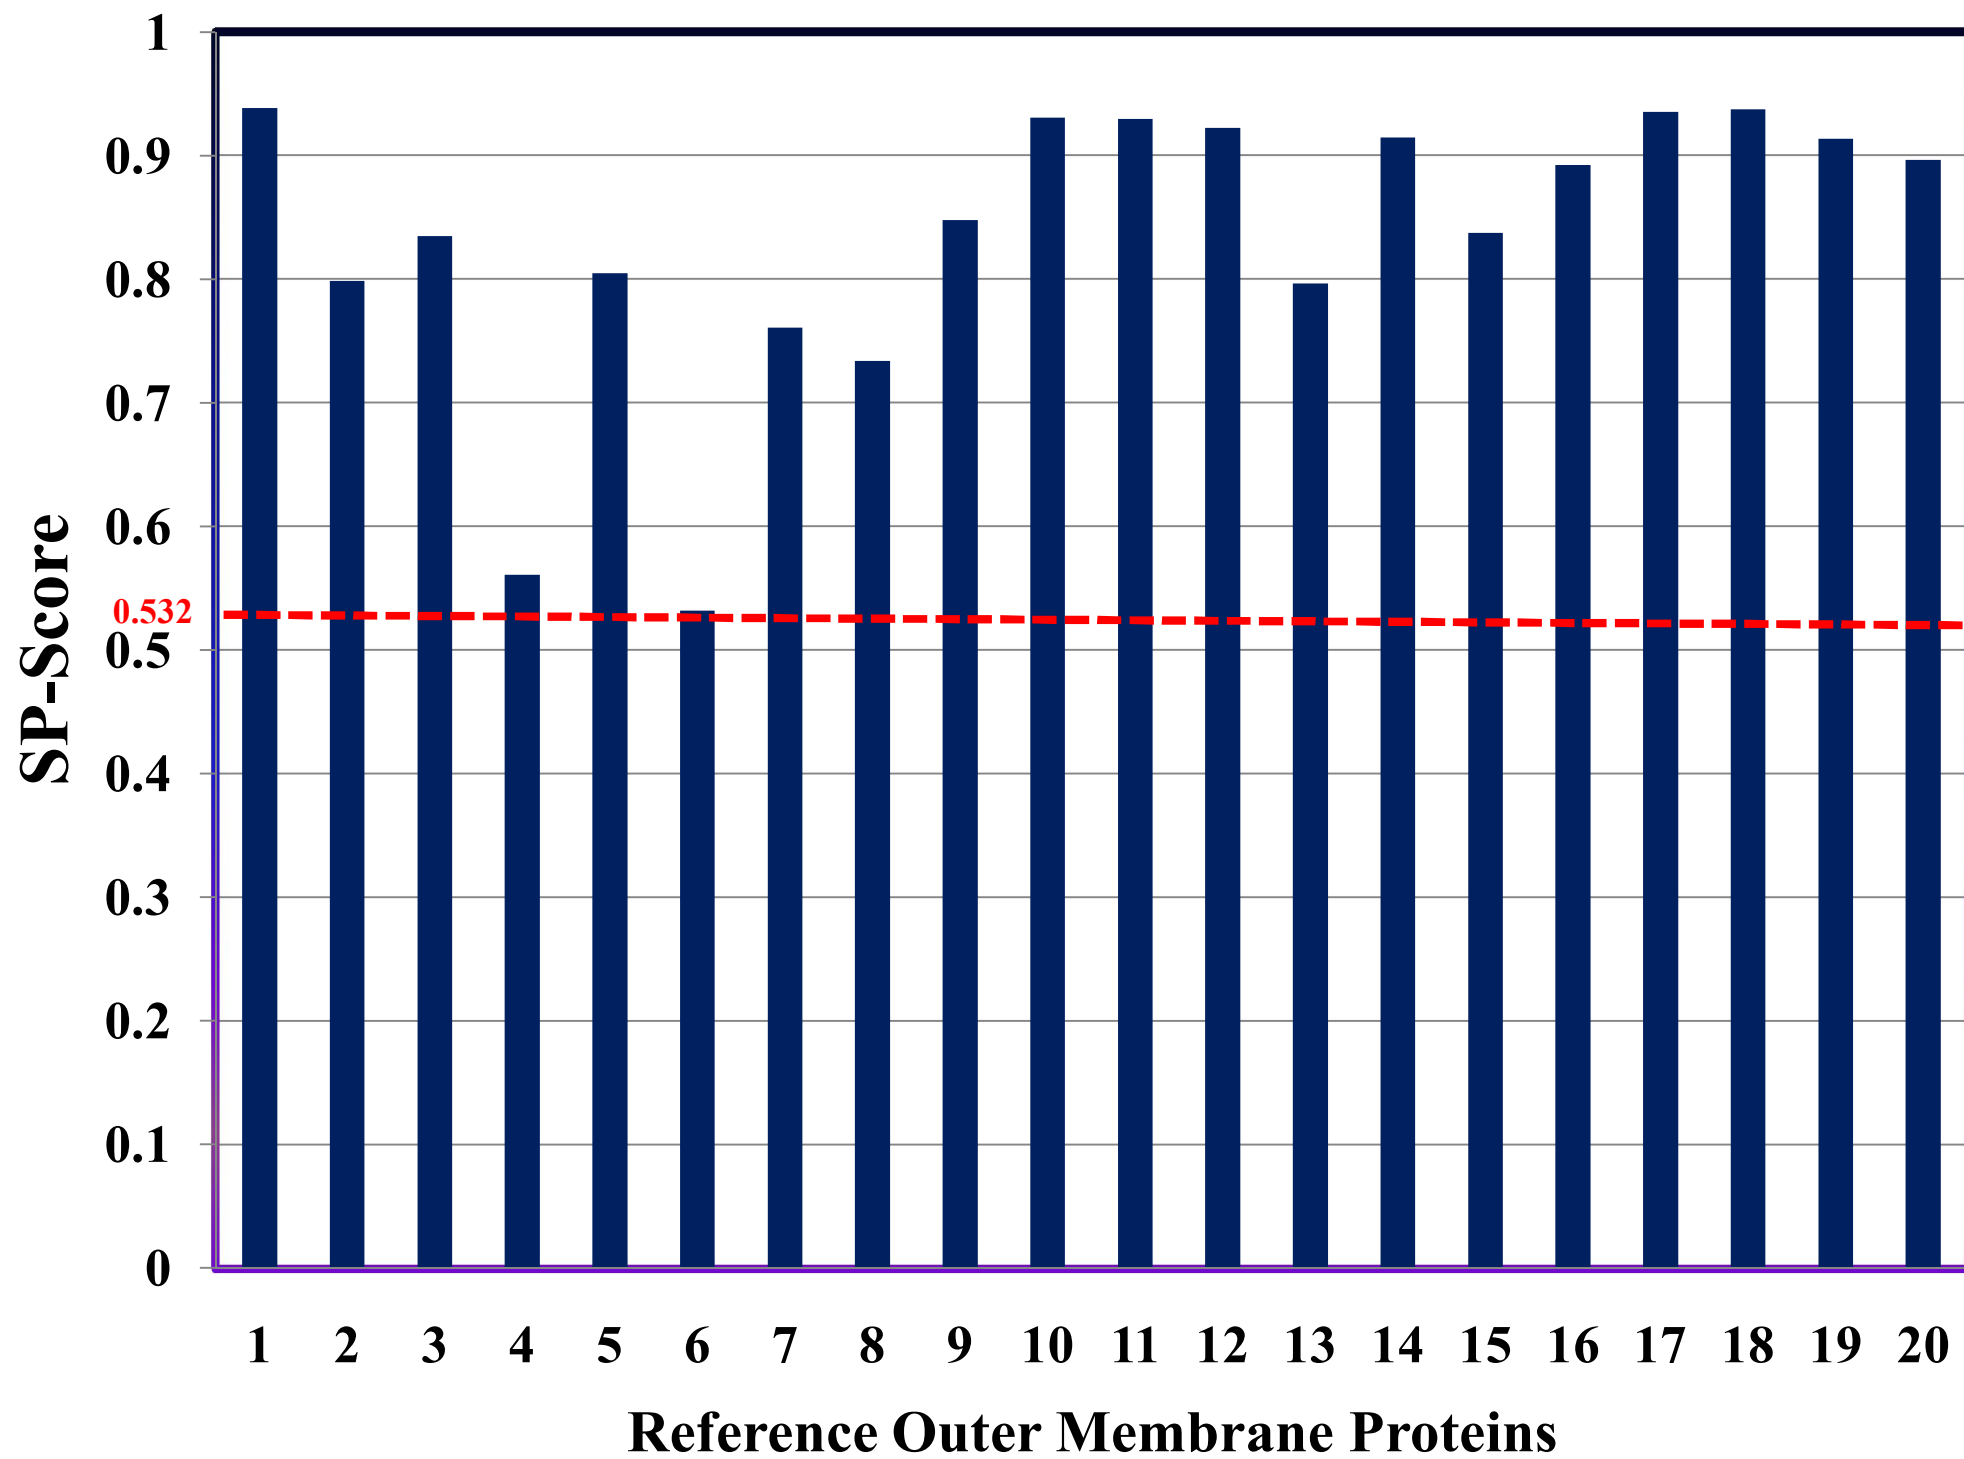

**Figure S2: Theoretical Isoelectric points.** Theoretical pI was computed using ProtParam tool .

**(a)** All the 30 well characterized reference OMPs were found to be rich in acidic amino acid residues and scored a pI of less than 6.5; **(b)** Out of 85 predicted OMPs, 58 proteins scored a minimum pI of 6.5 and were found to be rich in acidic residues.

**FIGURE S2**

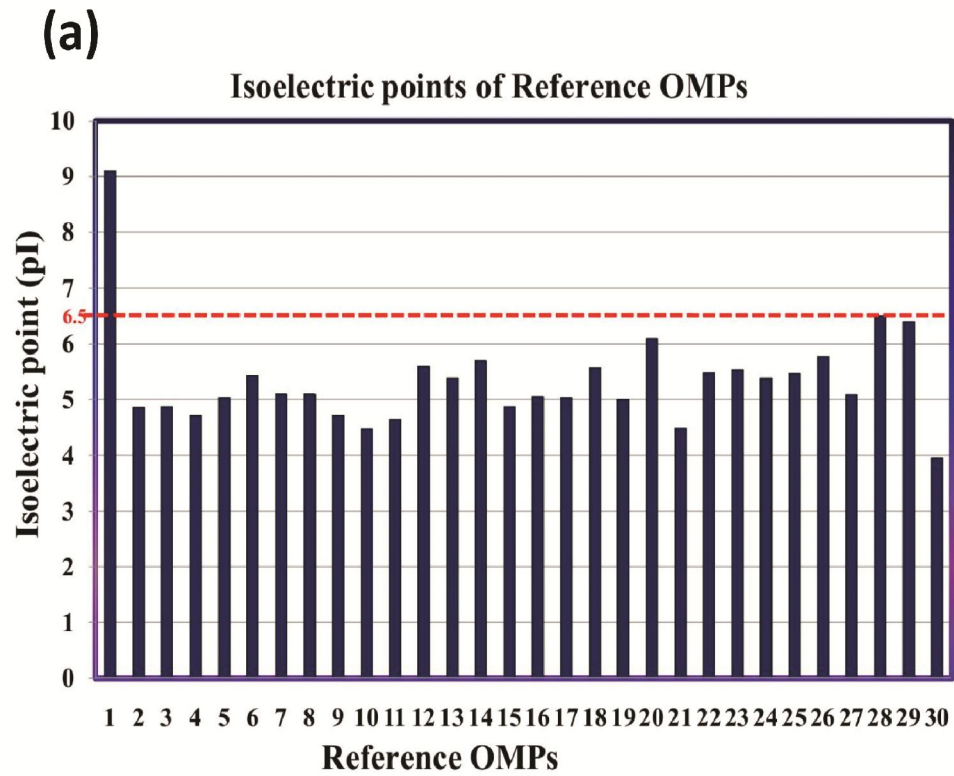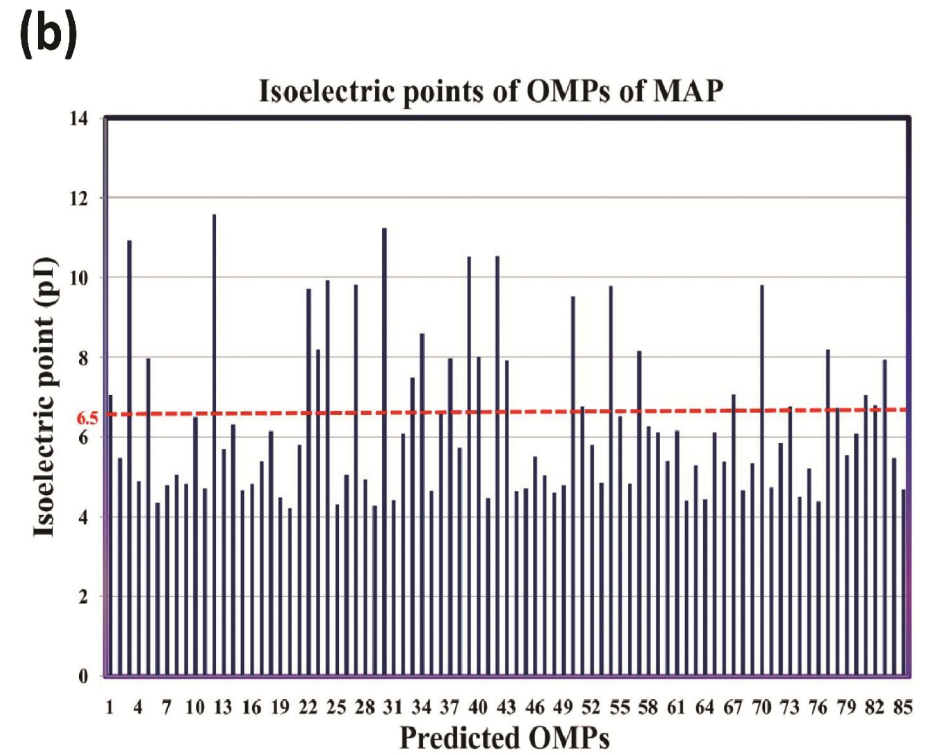

**Supplementary Table 1: Predicted putative 85 OMPs of MAP**

| SERIAL NO. | GI                | DESCRIPTION                           | LENGTH     | % $\beta$ -STRAND | AMPHIPHILICITY | pI          | FUNCTIONAL CATEGORY |
|------------|-------------------|---------------------------------------|------------|-------------------|----------------|-------------|---------------------|
| <b>1</b>   | <b>41406112</b>   | <b>HYPOTHETICAL PROTEIN MAP0014</b>   | <b>214</b> | <b>0.14</b>       | <b>0.9</b>     | <b>7.07</b> | <b>3</b>            |
| 2          | 41406117          | Pencillin Binding Protein A           | 462        | 0.14              | 0.7            | 5.47        | 3                   |
| 3          | 41406120          | Hypothetical Protein MAP0022c         | 125        | 0.29              | 0.42           | 10.95       | 9                   |
| 4          | 41406207          | MCE1B                                 | 338        | 0.14              | 1.43           | 4.89        | 0                   |
| <b>5</b>   | <b>41406245</b>   | <b>HYPOTHETICAL PROTEIN MAP0147c</b>  | <b>232</b> | <b>0.22</b>       | <b>0.96</b>    | <b>7.98</b> | <b>7</b>            |
| 6          | 41406325          | Hypothetical Protein MAP0227C         | 141        | 0.3               | 0.4            | 4.36        | 3                   |
| 7          | 41406378          | Hypothetical Protein MAP0280          | 298        | 0.1               | 1.74           | 4.78        | 7                   |
| 8          | 41406379          | Hypothetical Protein MAP0281          | 135        | 0.16              | 0.77           | 5.06        | 10                  |
| 9          | 41406476          | Hypothetical Protein MAP0378C         | 111        | 0.11              | 1.25           | 4.82        | 10                  |
| 10         | 41406499          | Hypothetical Protein MAP0401          | 191        | 0.17              | 0.66           | 6.51        | 7                   |
| 11         | 41406504          | Hypothetical Protein MAP0406          | 204        | 0.31              | 0.59           | 4.72        | 7                   |
| 12         | 41406518          | Hypothetical Protein MAP0420          | 67         | 0.19              | 0.38           | 11.6        | 10                  |
| 13         | 41406534          | Hypothetical Protein MAP0436          | 433        | 0.13              | 1.5            | 5.7         | 0                   |
| <b>14</b>  | <b>41406560 *</b> | <b>HYPOTHETICAL PROTEIN MAP0462 *</b> | <b>36</b>  | <b>0.14</b>       | <b>0.6</b>     | <b>6.32</b> | <b>7</b>            |

|           |                 |                                                  |            |             |             |              |          |
|-----------|-----------------|--------------------------------------------------|------------|-------------|-------------|--------------|----------|
| 15        | 41406593        | Hypothetical Protein<br>MAP0495C                 | 152        | 0.3         | 0.42        | 4.67         | 10       |
| 16        | 41406662        | MCE4                                             | 364        | 0.15        | 1.18        | 4.82         | 0        |
| 17        | 41406663        | Hypothetical Protein<br>MAP0565                  | 315        | 0.15        | 0.76        | 5.4          | 0        |
| 18        | 41406664        | Hypothetical Protein<br>MAP0566                  | 321        | 0.15        | 0.96        | 6.15         | 0        |
| 19        | 41406678        | Hypothetical Protein<br>MAP0580C                 | 60         | 0.35        | 0.19        | 4.48         | 0        |
| 20        | 41406681        | Hypothetical Protein<br>MAP0583                  | 194        | 0.36        | 0.29        | 4.22         | 7        |
| 21        | 41406793        | 3-(2,3-Dihydroxyphenyl)Propionat<br>edioxygenase | 299        | 0.09        | 1.5         | 5.8          | 7        |
| <b>22</b> | <b>41406858</b> | <b>HYPOTHETICAL<br/>PROTEIN MAP0760</b>          | <b>311</b> | <b>0.18</b> | <b>0.86</b> | <b>9.72</b>  | <b>0</b> |
| <b>23</b> | <b>41406859</b> | <b>HYPOTHETICAL<br/>PROTEIN MAP0761</b>          | <b>342</b> | <b>0.13</b> | <b>1.26</b> | <b>8.211</b> | <b>0</b> |
| 24        | 41406860        | Hypothetical Protein<br>MAP0762                  | 219        | 0.21        | 0.91        | 9.95         | 0        |
| 25        | 41406864        | Hypothetical Protein<br>MAP0766C                 | 150        | 0.4         | 0.25        | 4.32         | 1        |
| 26        | 41407047        | Hypothetical Protein<br>MAP0949                  | 596        | 0.16        | 0.91        | 5.06         | 10       |
| <b>27</b> | <b>41407050</b> | <b>HYPOTHETICAL<br/>PROTEIN MAP0952</b>          | <b>459</b> | <b>0.14</b> | <b>0.89</b> | <b>9.83</b>  | <b>7</b> |
| 28        | 41407072        | Hypothetical Protein<br>MAP0974                  | 342        | 0.34        | 0.3         | 4.94         | 3        |
| 29        | 41407140        | Preprotein Translocase<br>Subunit YAJC           | 92         | 0.35        | 0.28        | 4.28         | 3        |
| <b>30</b> | <b>41407215</b> | <b>Hypothetical protein<br/>MAP1117</b>          | <b>149</b> | <b>0.23</b> | <b>0.68</b> | <b>11.25</b> | <b>3</b> |

|           |                      |                                                      |            |             |             |              |           |
|-----------|----------------------|------------------------------------------------------|------------|-------------|-------------|--------------|-----------|
| 31        | 41407310             | Hypothetical Protein<br>MAP1212C                     | 294        | 0.11        | 1.23        | 4.41         | 10        |
| <b>32</b> | <b>41407321</b>      | <b>HYPOTHETICAL<br/>PROTEIN MAP1223c</b>             | <b>243</b> | <b>0.32</b> | <b>0.42</b> | <b>6.09</b>  | <b>10</b> |
| 33        | 41407332             | HYPOTHETICAL<br>PROTEIN MAP1234                      | 251        | 0.1         | 1.65        | 7.5          | 7         |
| 34        | 41409411             | HYPOTHETICAL<br>PROTEIN MAP3313                      | 371        | 0.33        | 0.44        | 8.59         | 10        |
| 35        | 41409479             | Hypothetical Protein<br>MAP3381                      | 465        | 0.13        | 1.11        | 4.66         | 10        |
| <b>36</b> | <b>41409526</b>      | <b>HYPOTHETICAL<br/>PROTEIN MAP3428c</b>             | <b>189</b> | <b>0.17</b> | <b>0.91</b> | <b>6.64</b>  | <b>3</b>  |
| <b>37</b> | <b>41409618</b>      | <b>HYPOTHETICAL<br/>PROTEIN MAP3520c</b>             | <b>505</b> | <b>0.35</b> | <b>0.45</b> | <b>7.98</b>  | <b>3</b>  |
| 38        | 41409826             | Hypothetical Protein<br>MAP3728                      | 325        | 0.1         | 1.42        | 5.74         | 10        |
| <b>39</b> | <b>41409830</b><br>* | <b>HYPOTHETICAL<br/>PROTEIN MAP3732c*</b>            | <b>129</b> | <b>0.39</b> | <b>4.2</b>  | <b>10.54</b> | <b>7</b>  |
| <b>40</b> | <b>41409848</b>      | <b>MmpS1</b>                                         | <b>121</b> | <b>0.4</b>  | <b>0.27</b> | <b>8.026</b> | <b>3</b>  |
| 41        | 41407435             | Hypothetical Protein<br>MAP1337C                     | 95         | 0.16        | 0.8         | 4.46         | 3         |
| <b>42</b> | <b>41407445</b>      | <b>HYPOTHETICAL<br/>PROTEIN MAP1347c</b>             | <b>272</b> | <b>0.13</b> | <b>0.83</b> | <b>10.55</b> | <b>10</b> |
| <b>43</b> | <b>41407531</b>      | <b>3-KETOSTEROID-<br/>DELTA-1-<br/>DEHYDROGENASE</b> | <b>550</b> | <b>0.11</b> | <b>1.06</b> | <b>7.92</b>  | <b>7</b>  |
| 44        | 41407574             | Hypothetical Protein<br>MAP1476C                     | 192        | 0.17        | 0.97        | 4.65         | 3         |
| 45        | 41407624             | Hypothetical Protein<br>MAP1526                      | 205        | 0.33        | 0.49        | 4.72         | 10        |
| 46        | 41407660             | Hypothetical Protein<br>MAP1562C                     | 105        | 0.23        | 0.5         | 5.51         | unknown   |
| 47        | 41407709             | Hypothetical Protein<br>MAP1611                      | 364        | 0.13        | 0.72        | 5.05         | 10        |

|           |                 |                                          |            |             |             |             |           |
|-----------|-----------------|------------------------------------------|------------|-------------|-------------|-------------|-----------|
| 48        | 41407722        | Hypothetical Protein<br>MAP1624          | 86         | 0.09        | 1.89        | 4.61        | 10        |
| 49        | 41407760        | Hypothetical Protein<br>MAP1662C         | 194        | 0.15        | 0.66        | 4.78        | 3         |
| <b>50</b> | <b>41407810</b> | <b>HYPOTHETICAL<br/>PROTEIN MAP1712</b>  | <b>245</b> | <b>0.11</b> | <b>1.22</b> | <b>9.54</b> | <b>1</b>  |
| <b>51</b> | <b>41407835</b> | <b>MmpS5</b>                             | <b>118</b> | <b>0.39</b> | <b>0.35</b> | <b>6.78</b> | <b>0</b>  |
| 52        | 41407950        | Hypothetical Protein<br>MAP1852          | 330        | 0.15        | 1.18        | 5.8         | 0         |
| 53        | 41407952        | Hypothetical Protein<br>MAP1854          | 351        | 0.17        | 1.02        | 4.85        | 0         |
| <b>54</b> | <b>41408018</b> | <b>HYPOTHETICAL<br/>PROTEIN MAP1920c</b> | <b>216</b> | <b>0.11</b> | <b>1.5</b>  | <b>9.79</b> | <b>10</b> |
| <b>55</b> | <b>41408190</b> | <b>UspC</b>                              | <b>420</b> | <b>0.09</b> | <b>1.51</b> | <b>6.52</b> | <b>3</b>  |
| 56        | 41408211        | Hypothetical Protein<br>MAP2113C         | 421        | 0.1         | 1.38        | 4.83        | 0         |
| <b>57</b> | <b>41408213</b> | <b>HYPOTHETICAL<br/>PROTEIN MAP2115c</b> | <b>311</b> | <b>0.15</b> | <b>1.04</b> | <b>8.17</b> | <b>0</b>  |
| 58        | 41408268        | MBTG                                     | 411        | 0.12        | 1.27        | 6.27        | 1         |
| 59        | 41408288        | Hypothetical Protein<br>MAP2190          | 311        | 0.15        | 1           | 6.13        | 0         |
| 60        | 41408289        | Hypothetical Protein<br>MAP2191          | 329        | 0.14        | 1.4         | 5.41        | 0         |
| 61        | 41408290        | Hypothetical Protein<br>MAP2192          | 422        | 0.11        | 1.51        | 6.16        | 0         |
| 62        | 41408332        | Hypothetical Protein<br>MAP2234          | 357        | 0.14        | 1.33        | 4.4         | 3         |
| 63        | 41408564        | Homoserine Kinase                        | 295        | 0.18        | 0.81        | 5.29        | 7         |
| 64        | 41408575        | Hypothetical Protein<br>MAP2477C         | 180        | 0.3         | 0.38        | 4.43        | 2         |
| 65        | 41408692        | Hypothetical Protein<br>MAP2594          | 507        | 0.13        | 1.18        | 6.13        | 10        |



|           |                 |                                          |            |             |             |             |           |
|-----------|-----------------|------------------------------------------|------------|-------------|-------------|-------------|-----------|
| 66        | 41408890        | Hypothetical Protein<br>MAP2792          | 492        | 0.11        | 1.21        | 5.39        | 7         |
| <b>67</b> | <b>41408931</b> | <b>HYPOTHETICAL<br/>PROTEIN MAP2833c</b> | <b>136</b> | <b>0.5</b>  | <b>0.3</b>  | <b>7.08</b> | <b>10</b> |
| 68        | 41408940        | Hypothetical Protein<br>MAP2842C         | 209        | 0.14        | 0.63        | 4.67        | 10        |
| 69        | 41409023        | Hypothetical Protein<br>MAP2925          | 356        | 0.13        | 1.22        | 5.35        | 7         |
| <b>70</b> | <b>41409055</b> | <b>HYPOTHETICAL<br/>PROTEIN MAP2957</b>  | <b>147</b> | <b>0.25</b> | <b>0.46</b> | <b>9.82</b> | <b>10</b> |
| 71        | 41409071        | LPPW                                     | 293        | 0.99        | 1.64        | 4.74        | 3         |
| 72        | 41409116        | Hypothetical Protein<br>MAP3018          | 155        | 0.11        | 1.53        | 5.84        | 3         |
| <b>73</b> | <b>41409148</b> | <b>HYPOTHETICAL<br/>PROTEIN MAP3050c</b> | <b>88</b>  | <b>0.17</b> | <b>0.73</b> | <b>6.78</b> | <b>3</b>  |
| 74        | 41409154        | LPQA                                     | 185        | 0.14        | 0.32        | 4.5         | 3         |
| 75        | 41409165        | Hypothetical Protein<br>MAP3067C         | 213        | 0.34        | 0.6         | 5.21        | 10        |
| 76        | 41409221        | Hypothetical Protein<br>MAP3123C         | 203        | 0.43        | 0.33        | 4.38        | 3         |
| <b>77</b> | <b>41409966</b> | <b>HYPOTHETICAL<br/>PROTEIN MAP3868</b>  | <b>285</b> | <b>0.13</b> | <b>0.68</b> | <b>8.21</b> | <b>6</b>  |
| <b>78</b> | <b>41410080</b> | <b>SenX3</b>                             | <b>384</b> | <b>0.11</b> | <b>1.05</b> | <b>6.74</b> | <b>0</b>  |
| 79        | 41410107        | Hypothetical Protein<br>MAP4009          | 208        | 0.12        | 1.37        | 5.54        | 3         |
| 80        | 41410120        | Hypothetical Protein<br>MAP4022          | 175        | 0.18        | 0.75        | 6.09        | 7         |
| <b>81</b> | <b>41410183</b> | <b>HYPOTHETICAL<br/>PROTEIN MAP4085</b>  | <b>314</b> | <b>0.15</b> | <b>1.04</b> | <b>7.06</b> | <b>0</b>  |
| 82        | 41410243        | Hypothetical Protein<br>MAP4145          | 224        | 0.14        | 1.06        | 6.81        | 3         |
| <b>83</b> | <b>41410334</b> | <b>HYPOTHETICAL<br/>PROTEIN MAP4236c</b> | <b>181</b> | <b>0.18</b> | <b>0.94</b> | <b>7.94</b> | <b>3</b>  |

|    |          |                                 |  |     |      |      |      |    |
|----|----------|---------------------------------|--|-----|------|------|------|----|
| 84 | 41410386 | LPQP                            |  | 284 | 0.2  | 0.92 | 5.47 | 3  |
| 85 | 41410387 | Hypothetical Protein<br>MAP4289 |  | 404 | 0.15 | 0.95 | 4.69 | 10 |

- Length: Length represents the mature protein obtained after deleting the predicted signal peptide sequence.
- \*Single  $\beta$ -stranded proteins.
- Protein showing a pI above 6.5 not considered as member of core set of OMPs (Shown in bold).

**Supplementary Table 2:** List of Potential N-linked and O-linked Glycosylated sites among 57 OMPs with GO terms.

| S. NO | GI       | GO IDENTIFIER | GO TERM NAME                               | DESCRIPTION                   | LENGTH | N-LINKED |          | O-LINKED |          |
|-------|----------|---------------|--------------------------------------------|-------------------------------|--------|----------|----------|----------|----------|
|       |          |               |                                            |                               |        | POSITION | RESIDUE  | POSITION | RESIDUE  |
| 1     | 41406117 | GO:0008658    | Penicillin Binding                         | Pencillin Binding Protein A   | 462    | 22       | NAT      | 92       | <b>S</b> |
|       |          |               |                                            |                               |        |          |          | 125      | <b>T</b> |
|       |          |               |                                            |                               |        | 109      | NGS      | 136      | <b>T</b> |
|       |          |               |                                            |                               |        |          |          | 181      | <b>S</b> |
|       |          |               |                                            |                               | 463    | NGA      | 230      | <b>T</b> |          |
|       |          |               |                                            |                               |        |          | 241      | <b>T</b> |          |
| 2     | 41406120 | GO:0005515    | Protein Binding                            | Hypothetical Protein MAP0022c | 125    | -        | -        | 92       | <b>T</b> |
|       |          |               |                                            |                               |        |          |          | 108      | <b>T</b> |
| 4     | 41406325 | -             | -                                          | Hypothetical Protein MAP0227C | 141    | 73       | NGS      | -        | -        |
| 5     | 41406378 | GO:0030245    | Cellulose Catabolic Process                | Hypothetical Protein MAP0280  | 298    | 187      | NAA      | 72       | <b>T</b> |
|       |          |               |                                            |                               |        |          |          | 91       | <b>T</b> |
|       |          | 267           | NWC                                        |                               |        | 164      | <b>S</b> |          |          |
|       |          |               |                                            |                               |        | 181      | <b>T</b> |          |          |
|       |          | 270           | NPS                                        |                               |        | 241      | <b>S</b> |          |          |
| 326   | NVG      | 284           | <b>T</b>                                   |                               |        |          |          |          |          |
|       |          | GO:0004553    | Hydrolase Activity, Hydrolyzing O-Glycosyl |                               |        |          |          |          |          |

|    |          |            |                                           |                               |     |     |     |     |   |
|----|----------|------------|-------------------------------------------|-------------------------------|-----|-----|-----|-----|---|
|    |          |            | Compounds                                 |                               |     |     |     |     |   |
| 6  | 41406379 | -          | -                                         | Hypothetical Protein MAP0281  | 135 | 71  | NGV | -   | - |
|    |          |            |                                           |                               |     | 131 | NCG |     |   |
| 7  | 41406476 | -          | -                                         | Hypothetical Protein MAP0378C | 111 | -   | -   | -   | - |
| 8  | 41406499 | GO:0055114 | Oxidation - Reduction Process             | Hypothetical Protein MAP0401  | 191 | 115 | NFW | 80  | T |
|    |          | GO:0016209 | Antioxidant Activity                      |                               |     |     |     | 154 | T |
|    |          | GO:0045454 | Cell Redox Homeostasis                    |                               |     |     |     | 190 | T |
|    |          | GO:0006662 | Glycerol Ether Metabolic Process          |                               |     |     |     | 202 | T |
|    |          | GO:0015035 | Protein Disulfide Oxidoreductase Activity |                               |     |     |     | 208 | S |
| 9  | 41406504 | GO:0003824 | Catalytic Activity                        | Hypothetical Protein MAP0406  | 204 | 117 | NGF | -   | - |
|    |          |            |                                           |                               |     | 190 | NLP |     |   |
|    |          |            |                                           |                               |     | 218 | NAK |     |   |
| 10 | 41406518 | -          | -                                         | Hypothetical Protein MAP0420  | 67  | -   | -   | -   | - |
| 11 | 41406534 | GO:0006508 | Proteolysis                               | Hypothetical Protein MAP0436  | 433 | 145 | NAQ | 137 | T |
|    |          |            |                                           |                               |     | 239 | NSR | 326 | T |
|    |          |            |                                           |                               |     | 443 | NGR | 336 | T |

|    |          |            |                                     |                                              |     |     |     |     |   |
|----|----------|------------|-------------------------------------|----------------------------------------------|-----|-----|-----|-----|---|
|    |          |            |                                     |                                              |     | 446 | NAM |     |   |
| 12 | 41406593 | -          | -                                   | Hypothetical Protein MAP0495C                | 152 | 173 | NIT | -   | - |
| 13 | 41406662 | -          | -                                   | MCE4                                         | 364 | 66  | NSK | -   | - |
|    |          |            |                                     |                                              |     | 76  | NAT |     |   |
|    |          |            |                                     |                                              |     | 140 | NGT |     |   |
|    |          |            |                                     |                                              |     | 320 | NCR |     |   |
| 14 | 41406663 | -          | -                                   | Hypothetical Protein MAP0565                 | 315 | 162 | NTI | 96  | S |
|    |          |            |                                     |                                              |     | 289 | NND | 130 | T |
|    |          |            |                                     |                                              |     | 324 | NGP | 166 | S |
| 15 | 41406664 | -          | -                                   | Hypothetical Protein MAP0566                 | 321 | 145 | NAS | 240 | S |
|    |          |            |                                     |                                              |     | 148 | NLN |     |   |
|    |          |            |                                     |                                              |     | 150 | NKP |     |   |
|    |          |            |                                     |                                              |     | 308 | NVY |     |   |
| 16 | 41406678 | -          | -                                   | Hypothetical Protein MAP0580C                | 60  | -   | -   | -   | - |
| 17 | 41406681 | GO:0003824 | Catalytic Activity                  | Hypothetical Protein MAP0583                 | 194 | 182 | NPD | 112 | S |
| 18 | 41406793 | GO:0008198 | Ferrous Iron Binding                | 3-(2,3-Dihydroxyphenyl)Propionatedioxygenase | 299 | 237 | NPT | -   | - |
|    |          | GO:0055114 | Oxidation - Reduction Process       |                                              |     |     |     |     |   |
|    |          | GO:0019439 | Aromatic Compound Catabolic Process |                                              |     |     |     |     |   |
|    |          | GO:0047070 | 3-Carboxyethylcatech                |                                              |     |     |     |     |   |

|     |          |            |                             |                               |     |     |     |     |     |     |   |
|-----|----------|------------|-----------------------------|-------------------------------|-----|-----|-----|-----|-----|-----|---|
|     |          |            | ol 2,3-Dioxygenase Activity |                               |     |     |     |     |     |     |   |
| 19  | 41406860 | -          | -                           | Hypothetical Protein MAP0762  | 219 | 23  | NTF | 179 | S   |     |   |
|     |          |            |                             |                               |     | 56  | NIK | 209 | S   |     |   |
|     |          |            |                             |                               |     | 167 | NGD |     |     |     |   |
|     |          |            |                             |                               |     | 187 | NGS |     |     |     |   |
|     |          |            |                             |                               |     | 191 | NIV |     |     |     |   |
|     |          |            |                             |                               |     | 228 | NDS |     |     |     |   |
| 20  | 41406864 | -          | -                           | Hypothetical Protein MAP0766C | 150 | 130 | NEY | -   | -   |     |   |
| 21  | 41407047 | GO:0005515 | Protein Binding             | Hypothetical Protein MAP0949  | 596 | 308 | NCT | 95  | S   |     |   |
|     |          |            |                             |                               |     |     |     | 194 | T   |     |   |
|     |          |            |                             |                               |     |     |     | 246 | S   |     |   |
|     |          |            |                             |                               |     |     |     | 95  | S   |     |   |
|     |          |            |                             |                               |     |     |     | 329 | NQT | 194 | T |
|     |          |            |                             |                               |     |     |     |     |     | 246 | T |
|     |          | 277        | T                           |                               |     |     |     |     |     |     |   |
|     |          | 278        | T                           |                               |     |     |     |     |     |     |   |
|     |          | 285        | T                           |                               |     |     |     |     |     |     |   |
|     |          | 294        | S                           |                               |     |     |     |     |     |     |   |
|     |          | 346        | NDI                         | 303                           |     | T   |     |     |     |     |   |
|     |          |            |                             | 310                           |     | S   |     |     |     |     |   |
|     |          |            |                             | 334                           |     | S   |     |     |     |     |   |
|     |          |            |                             | 335                           |     | T   |     |     |     |     |   |
|     |          |            |                             | 440                           |     | NVS | 339 | T   |     |     |   |
| 397 | T        |            |                             |                               |     |     |     |     |     |     |   |
| 442 | T        |            |                             |                               |     |     |     |     |     |     |   |
| 454 | T        |            |                             |                               |     |     |     |     |     |     |   |
| 22  | 41407072 | GO:0005576 | Extracellular Region        | Hypothetical Protein MAP0974  | 342 | 7   | NPS | 125 | T   |     |   |
|     |          |            |                             |                               |     | 131 | NRG |     |     |     |   |
|     |          |            |                             |                               |     | 219 | NAR | 167 | T   |     |   |
|     |          |            |                             |                               |     | 254 | NGV |     |     |     |   |
|     |          |            |                             |                               |     | 329 | NGG |     |     |     |   |
| 23  | 414071   | -          | -                           | Preprotein                    | 92  | -   | -   | 38  | S   |     |   |

|    |              |                |                       |                                     |     |     |            |     |          |
|----|--------------|----------------|-----------------------|-------------------------------------|-----|-----|------------|-----|----------|
|    | 40           |                |                       | Translocase<br>Subunit YAJC         |     |     |            | 54  | <b>T</b> |
|    |              |                |                       |                                     |     |     |            | 59  | <b>T</b> |
|    |              |                |                       |                                     |     |     |            | 62  | <b>T</b> |
|    |              |                |                       |                                     |     |     |            | 73  | <b>T</b> |
|    |              |                |                       |                                     |     |     |            | 98  | <b>S</b> |
| 24 | 414073<br>10 | -              | -                     | Hypothetical<br>Protein<br>MAP1212C | 294 | 27  | <b>NAW</b> | 162 | <b>T</b> |
|    |              |                |                       |                                     |     | 100 | <b>NVV</b> |     |          |
|    |              |                |                       |                                     |     | 133 | <b>NPH</b> |     |          |
| 25 | 414094<br>79 | -              | -                     | Hypothetical<br>Protein<br>MAP3381  | 465 | 28  | <b>NVR</b> | 226 | <b>S</b> |
|    |              |                |                       |                                     |     | 363 | <b>NDT</b> | 251 | <b>S</b> |
|    |              |                |                       |                                     |     | 440 | <b>NDY</b> |     |          |
| 26 | 414098<br>26 | GO:000<br>5488 | Binding               | Hypothetical<br>Protein<br>MAP3728  | 325 | 100 | <b>NAE</b> | 68  | <b>T</b> |
|    |              |                |                       |                                     |     |     |            | 83  | <b>T</b> |
|    |              |                |                       |                                     |     |     |            | 88  | <b>T</b> |
|    |              |                |                       |                                     |     |     |            | 136 | <b>T</b> |
|    |              |                |                       |                                     |     |     |            | 168 | <b>T</b> |
|    |              |                |                       |                                     |     |     |            | 197 | <b>T</b> |
|    |              |                |                       |                                     |     |     |            | 198 | <b>T</b> |
|    |              |                |                       |                                     |     |     |            | 207 | <b>T</b> |
|    |              |                |                       |                                     |     |     |            | 253 | <b>S</b> |
| 27 | 414074<br>35 | 0016020        | Membran<br>e          | Hypothetical<br>Protein<br>MAP1337C | 95  | -   | -          | 183 | <b>S</b> |
| 28 | 414075<br>74 | GO:001<br>6787 | Hydrolase<br>Activity | Hypothetical<br>Protein<br>MAP1476C | 192 | 210 | <b>NPA</b> | 81  | <b>S</b> |
|    |              |                |                       |                                     |     |     |            | 97  | <b>T</b> |
|    |              |                |                       |                                     |     |     |            | 103 | <b>S</b> |
| 29 | 414076<br>24 | GO:000<br>3824 | Catalytic<br>Activity | Hypothetical<br>Protein<br>MAP1526  | 205 | 172 | <b>NGD</b> | -   | -        |
| 30 | 414076<br>60 | GO:000<br>8152 | Metabolic<br>Process  | Hypothetical<br>Protein<br>MAP1562C | 105 | 83  | <b>NAS</b> | 72  | <b>S</b> |
|    |              | GO:001<br>6787 | Hydrolase<br>Activity |                                     |     |     |            |     |          |
| 31 | 414077<br>09 | -              | -                     | Hypothetical<br>Protein<br>MAP1611  | 364 | -   | -          | 141 | <b>S</b> |

|    |              |   |   |                                     |     |     |     |     |          |     |          |
|----|--------------|---|---|-------------------------------------|-----|-----|-----|-----|----------|-----|----------|
| 32 | 414077<br>22 | - | - | Hypothetical<br>Protein<br>MAP1624  | 86  | 36  | NKT | 32  | <b>S</b> |     |          |
|    |              |   |   |                                     |     |     |     | 72  | <b>S</b> |     |          |
| 33 | 414077<br>60 | - | - | Hypothetical<br>Protein<br>MAP1662C | 194 | 33  | NCT | 49  | <b>S</b> |     |          |
|    |              |   |   |                                     |     |     |     | 46  | NES      | 91  | <b>S</b> |
|    |              |   |   |                                     |     |     |     | 67  | NRT      | 160 | <b>T</b> |
|    |              |   |   |                                     |     |     |     | 151 | NGS      |     |          |
|    |              |   |   |                                     |     |     |     | 163 | NPT      |     |          |
|    |              |   |   |                                     |     |     |     | 167 | NDR      |     |          |
| 34 | 414079<br>50 | - | - | Hypothetical<br>Protein<br>MAP1852  | 330 | 90  | NTL | 78  | <b>S</b> |     |          |
|    |              |   |   |                                     |     |     |     | 99  | NIV      | 94  | <b>S</b> |
|    |              |   |   |                                     |     |     |     | 157 | NLT      | 130 | <b>T</b> |
|    |              |   |   |                                     |     |     |     | 214 | NLD      | 181 | <b>S</b> |
| 35 | 414079<br>52 | - | - | Hypothetical<br>Protein<br>MAP1854  | 351 | 68  | NPR | 190 | <b>S</b> |     |          |
|    |              |   |   |                                     |     |     |     | 207 | NLS      | 327 | <b>S</b> |
|    |              |   |   |                                     |     |     |     | 245 | NTG      |     |          |
|    |              |   |   |                                     |     |     |     | 264 | NRD      |     |          |
|    |              |   |   |                                     |     |     |     | 276 | NDT      |     |          |
| 36 | 414082<br>11 | - | - | Hypothetical<br>Protein<br>MAP2113C | 421 | 48  | NGL | -   | -        |     |          |
|    |              |   |   |                                     |     |     |     | 171 | NLR      |     |          |
|    |              |   |   |                                     |     |     |     | 206 | NLQ      |     |          |
|    |              |   |   |                                     |     |     |     | 301 | NFL      |     |          |
|    |              |   |   |                                     |     |     |     | 321 | NFA      |     |          |
|    |              |   |   |                                     |     |     |     | 369 | NPF      |     |          |
| 37 | 414082<br>68 | - | - | MBTG                                | 411 | 177 | NPR | -   | -        |     |          |
|    |              |   |   |                                     |     |     |     | 383 | NLS      |     |          |
|    |              |   |   |                                     |     |     |     | 395 | NLS      |     |          |
| 38 | 414082<br>88 | - | - | Hypothetical<br>Protein<br>MAP2190  | 311 | 101 | NLV | 131 | <b>T</b> |     |          |
| 39 | 414082<br>89 | - | - | Hypothetical<br>Protein<br>MAP2191  | 329 | 162 | NQS | 243 | <b>S</b> |     |          |
|    |              |   |   |                                     |     |     |     | 248 | NVS      | 257 | <b>T</b> |
|    |              |   |   |                                     |     |     |     | 263 | NES      |     |          |
|    |              |   |   |                                     |     |     |     | 284 | NRD      |     |          |

|    |              |                |                       |                                     |     |     |     |     |   |
|----|--------------|----------------|-----------------------|-------------------------------------|-----|-----|-----|-----|---|
|    |              |                |                       |                                     |     | 287 | NLS |     |   |
|    |              |                |                       |                                     |     | 308 | NGF |     |   |
| 40 | 414082<br>90 | -              | -                     | Hypothetical<br>Protein<br>MAP2192  | 422 | 192 | NGS | 63  | S |
|    |              |                |                       |                                     |     | 196 | NIV |     |   |
|    |              |                |                       |                                     |     | 215 | NQQ |     |   |
|    |              |                |                       |                                     |     | 245 | NLS | 184 | S |
|    |              |                |                       |                                     |     | 287 | NIL |     |   |
|    |              |                |                       |                                     |     | 298 | NGY |     |   |
|    |              |                |                       |                                     |     | 318 | NLS |     |   |
|    |              |                |                       |                                     |     | 321 | NPV |     |   |
|    |              |                |                       |                                     |     | 335 | NVT | 229 | S |
|    |              |                |                       |                                     |     | 359 | NYL |     |   |
|    |              |                |                       |                                     |     | 410 | NGD |     |   |
| 41 | 414083<br>32 | -              | -                     | Hypothetical<br>Protein<br>MAP2234  | 357 | 255 | NPS | -   | - |
|    |              |                |                       |                                     |     | 269 | NSR |     |   |
| 42 | 414085<br>64 | GO:000<br>5524 | ATP<br>Binding        | Homoserine<br>Kinase                | 295 | 22  | NLG | 41  | T |
|    |              |                |                       |                                     |     |     |     | 45  | T |
|    |              |                |                       |                                     |     |     |     | 47  | S |
|    |              |                |                       |                                     |     |     |     | 157 | T |
|    |              |                |                       |                                     |     |     |     | 190 | S |
|    |              |                |                       |                                     |     |     |     | 195 | T |
|    |              |                |                       |                                     |     | 211 | NVS | 213 | S |
|    |              |                |                       |                                     |     |     |     | 264 | T |
|    |              |                |                       |                                     |     |     |     | 266 | S |
|    |              |                |                       |                                     |     |     |     | 279 | S |
|    |              |                |                       |                                     |     |     |     | 295 | T |
| 43 | 414085<br>75 | GO:001<br>6787 | Hydrolase<br>Activity | Hypothetical<br>Protein<br>MAP2477C | 180 | -   | -   | 120 | T |
| 44 | 414086<br>92 | -              | -                     | Hypothetical<br>Protein<br>MAP2594  | 507 | 170 | NDE | 161 | S |
|    |              |                |                       |                                     |     | 369 | NRS | 281 | S |
| 45 | 414088<br>90 | -              | -                     | Hypothetical<br>Protein<br>MAP2792  | 492 | 121 | NQT | 112 | S |
|    |              |                |                       |                                     |     | 212 | NCT | 140 | S |
|    |              |                |                       |                                     |     | 343 | NAI | 210 | T |



|    |              |                |                                |                                     |     |     |     |     |          |
|----|--------------|----------------|--------------------------------|-------------------------------------|-----|-----|-----|-----|----------|
|    |              |                |                                |                                     |     | 358 | NAT |     |          |
| 46 | 414089<br>40 | -              | -                              | Hypothetical<br>Protein<br>MAP2842C | 209 | -   | -   | -   | -        |
| 47 | 414090<br>23 | GO:000<br>3824 | Catalytic<br>Activity          | Hypothetical<br>Protein<br>MAP2925  | 356 | 239 | NAA | -   | -        |
|    |              | GO:000<br>8152 | Metabolic<br>Process           |                                     |     |     |     |     |          |
| 48 | 414090<br>71 | -              | -                              | LPPW                                | 293 | 235 | NGV | 155 | <b>S</b> |
|    |              |                |                                |                                     |     |     |     | 227 | <b>S</b> |
| 49 | 414091<br>16 | -              | -                              | Hypothetical<br>Protein<br>MAP3018  | 155 | 181 | NPG | -   | -        |
| 50 | 414091<br>54 | -              | -                              | LPQA                                | 185 | 152 | NGS | -   | -        |
| 51 | 414091<br>65 | -              | -                              | Hypothetical<br>Protein<br>MAP3067C | 213 | -   | -   | 97  | <b>S</b> |
|    |              |                |                                |                                     |     |     |     | 101 | <b>S</b> |
| 52 | 414092<br>21 | -              | -                              | Hypothetical<br>Protein<br>MAP3123C | 203 | 40  | NPP | -   | -        |
|    |              |                |                                |                                     |     | 201 | NRV |     |          |
| 53 | 414101<br>07 | GO:001<br>6787 | Hydrolase<br>Activity          | Hypothetical<br>Protein<br>MAP4009  | 208 | 69  | NEG | -   | -        |
| 54 | 414101<br>20 | GO:001<br>6491 | Oxidored<br>uctase<br>Activity | Hypothetical<br>Protein<br>MAP4022  | 175 | 85  | NIW | 42  | <b>T</b> |
|    |              |                |                                |                                     |     |     |     | 50  | <b>S</b> |
|    |              |                |                                |                                     |     |     |     | 71  | <b>S</b> |
|    |              |                |                                |                                     |     |     |     | 159 | <b>T</b> |
|    |              |                |                                |                                     |     |     |     | 164 | <b>S</b> |
| 55 | 414102<br>43 | -              | -                              | Hypothetical<br>Protein<br>MAP4145  | 224 | 74  | NGV | -   | -        |
|    |              |                |                                |                                     |     | 129 | NAR |     |          |
|    |              |                |                                |                                     |     | 138 | NPT |     |          |
|    |              |                |                                |                                     |     | 168 | NTT |     |          |
|    |              |                |                                |                                     |     | 190 | NNI |     |          |
| 56 | 414103       | -              | -                              | LPQP                                | 284 | 142 | NAV | 125 | <b>T</b> |

|    |              |                |                                     |                                    |     |     |            |     |          |
|----|--------------|----------------|-------------------------------------|------------------------------------|-----|-----|------------|-----|----------|
|    | 86           |                |                                     |                                    |     |     |            | 135 | <b>T</b> |
|    |              |                |                                     |                                    |     | 227 | <b>NGS</b> | 162 | <b>T</b> |
|    |              |                |                                     |                                    |     |     |            | 202 | <b>S</b> |
| 57 | 414103<br>87 | GO:001<br>6042 | Lipid<br>Catabolic<br>Process       | Hypothetical<br>Protein<br>MAP4289 | 404 | -   | -          | 341 | <b>S</b> |
|    |              | GO:000<br>4806 | Triglyceri<br>de Lipase<br>Activity |                                    |     |     |            |     |          |

a) GI: Gene Identifier

b) "-": Absent

## **Abbreviations**

BLAST, Basic Local Alignment Search Tool; EMBL, European Molecular Biology Laboratory; FASTA, FAST-ALL; GSP, General Secretory Pathway; HMMTOP, Hidden Markov Model for Topology Prediction; IMP, Inner Membrane Protein; MAP, *Mycobacterium avium* subsp. *paratuberculosis*; MATLAB, Matrix Laboratory; NCBI, National Centre For Biotechnology Information; OMPs, Outer Membrane Proteins; OmpATb, OMP A of *Mycobacterium tuberculosis*; PEDANT, Protein Extraction Description and Analysis Tool; pI, Isoelectric Point; SCL, Sub-cellular Localization; SRP, Signal Recognition Particle; TMHMM, Transmembrane Hidden Markov Model.
